# Supplementary material for: B Cell Fcγ Receptor IIb Modulates Atherosclerosis in Male and Female Mice by Controlling Adaptive Germinal Center and Innate B-1-Cell Responses
Source: PubMed Central journal article supplement (PMC6636804; doi:10.1161/atvbaha.118.312272), 2019-05-16
Supplement: atv-39-1379-s001.pdf [file atv-39-1379-s001.pdf]

Chakraborty et al

B cell FcγRIIb and Atherosclerosis

Major Resources Tables

Animals (in vivo studies)

| Strain                         | Vendor or Source | Background Strain | Sex   |
|--------------------------------|------------------|-------------------|-------|
| <i>FcγRIIb<sup>Btg</sup></i>   | Authors          | C57BL6            | Both  |
| <i>FcγRIIb<sup>Mtg</sup></i>   | Authors          | C57BL6            | Males |
| <i>FcγRIIb<sup>ΔAP-1</sup></i> | Authors          | C57BL6            | Both  |
| <i>Ldlr<sup>-/-</sup></i>      | Jackson Labs     | C57BL6            | Male  |
| <i>Apoe<sup>-/-</sup></i>      | Charles River    | C57BL6            | Both  |

Animal breeding

Animal breeding for experiments is detailed in methods. *Ldlr<sup>-/-</sup>* and *Apoe<sup>-/-</sup>* strains were maintained by homozygous x homozygous breeding.

Antibodies

See supplemental table I.
