# Supplementary material for: B Cell Fcγ Receptor IIb Modulates Atherosclerosis in Male and Female Mice by Controlling Adaptive Germinal Center and Innate B-1-Cell Responses
Source: PubMed Central journal article supplement (PMC6636804; doi:10.1161/atvbaha.118.312272), 2019-05-16
Supplement: atv-39-1379-s003.pdf [file atv-39-1379-s003.pdf]

**Chakraborty et al**  
**B Cell FcγRIIb and Atherosclerosis**  
**Supplemental Material**

# Supplemental Figure I

Pre-gated on Fsc/SSc  
and Live/Dead staining

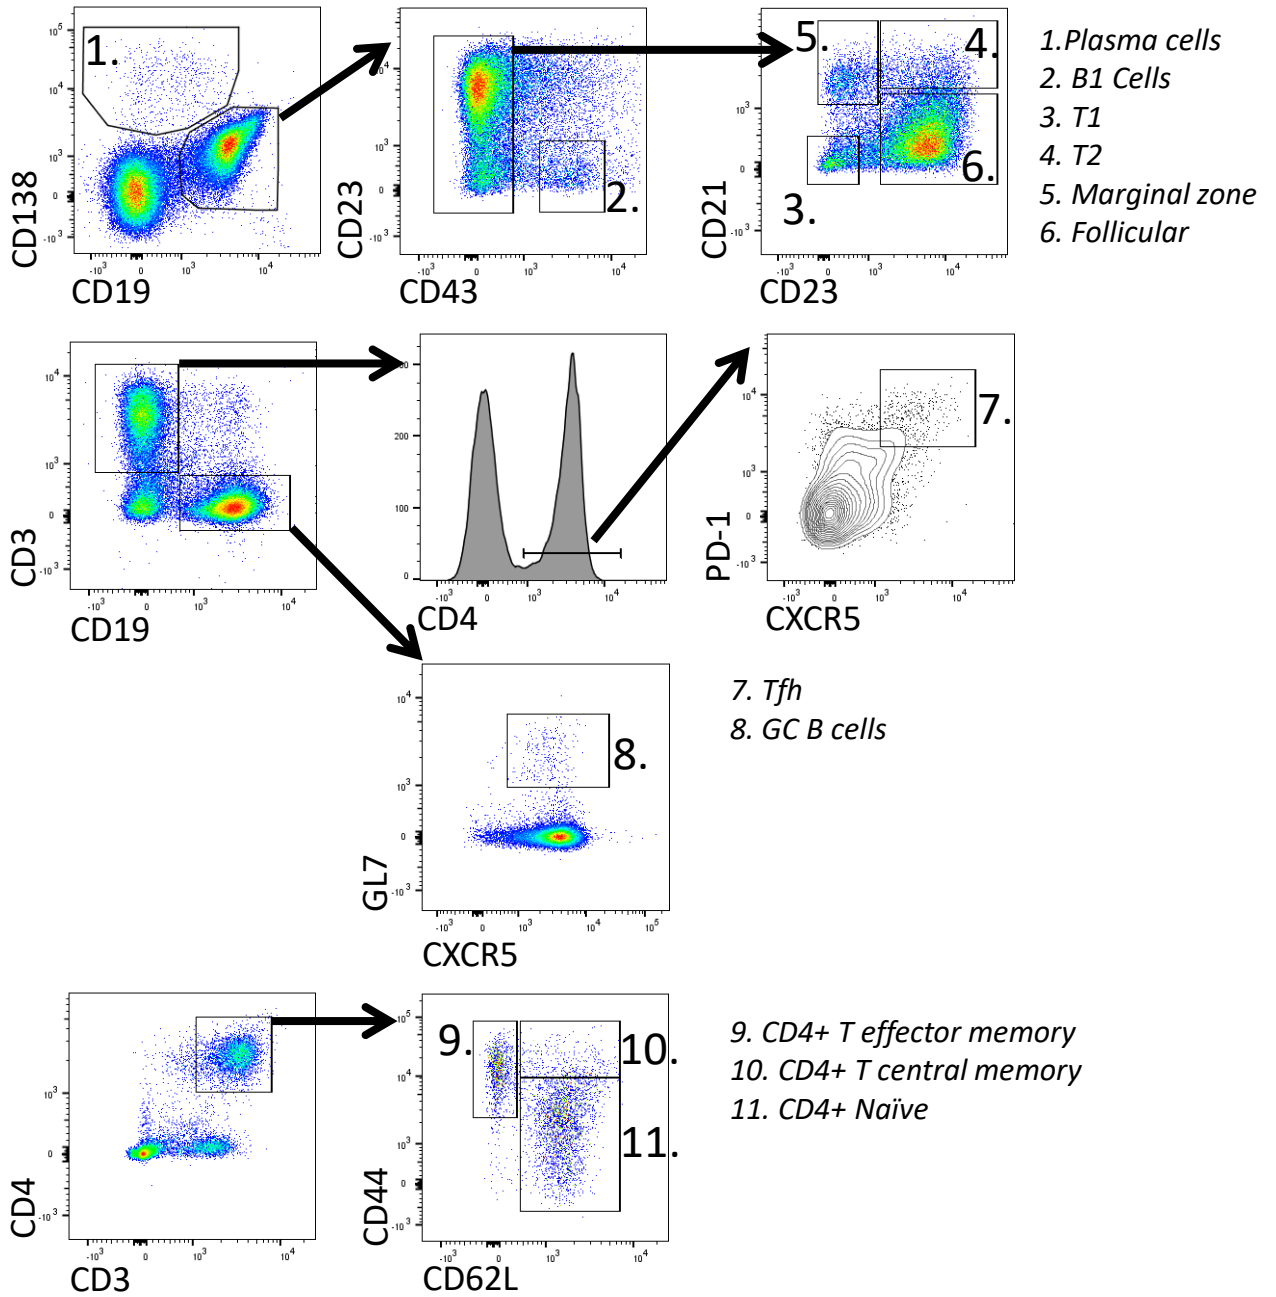

**Supplemental Figure I.** Gating strategies used in flow cytometry. In some experiments, GC B cells were gated as B220<sup>+</sup> IgM<sup>+</sup> CD95<sup>+</sup> GL7<sup>+</sup>. B1 cells are additionally CD19<sup>+</sup> IgM<sup>+</sup> B220<sup>lo</sup>.

## Supplemental Figure II

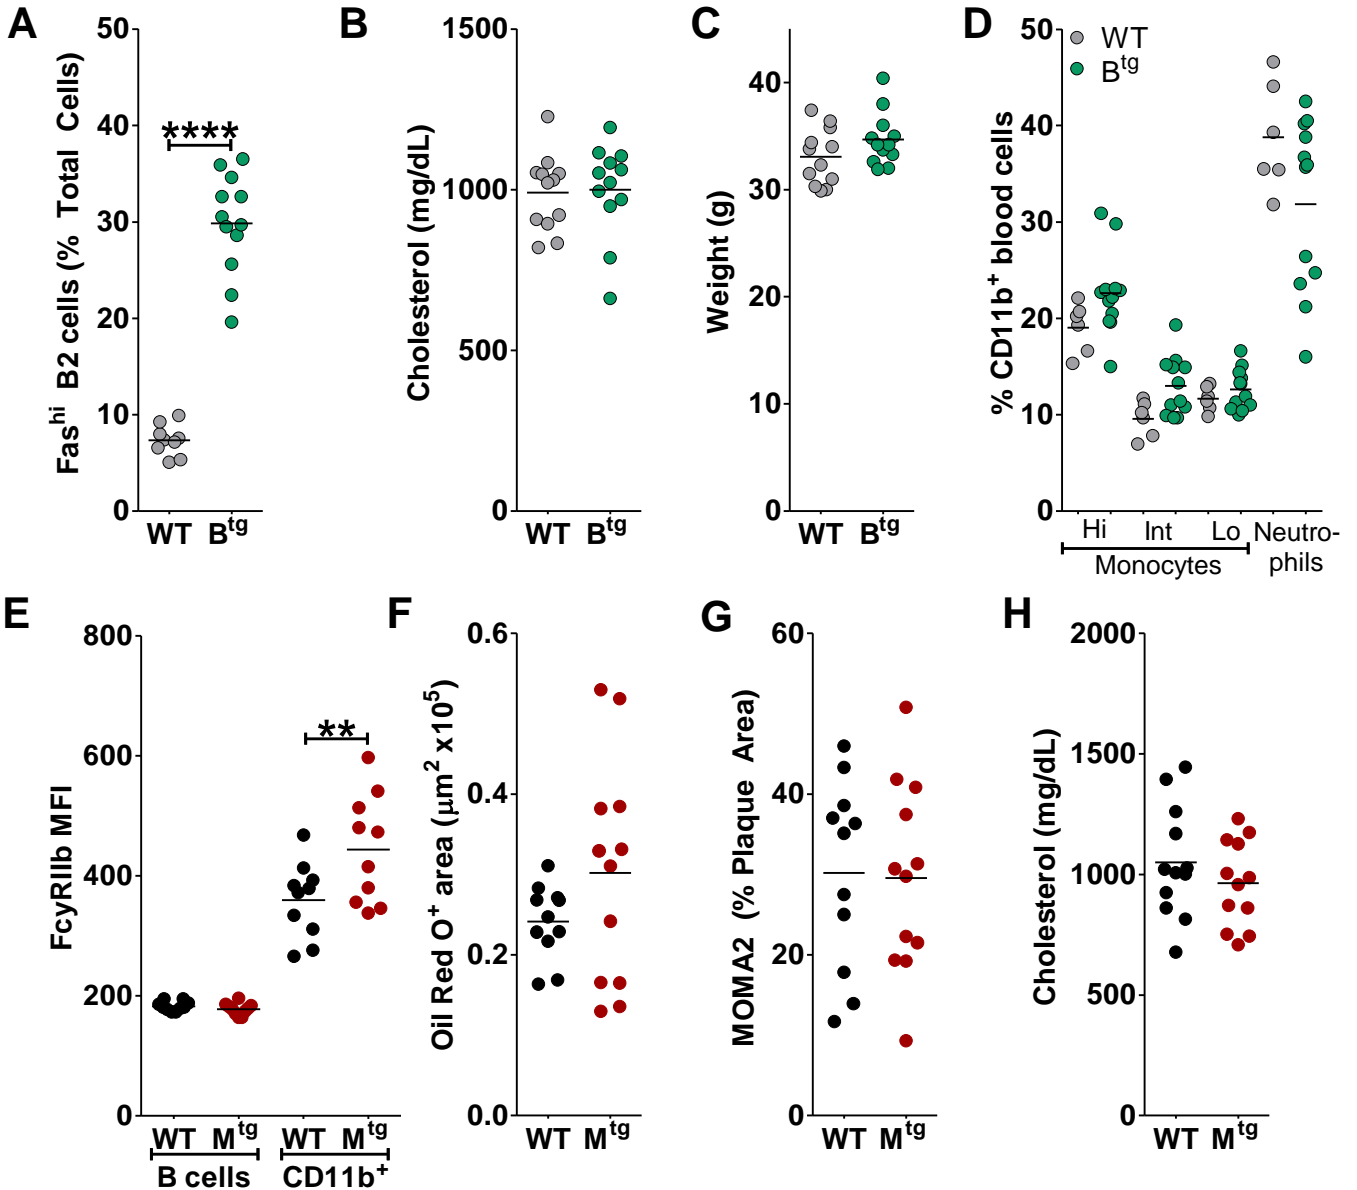

**Supplemental Figure II. A-D.** Analysis of *Ldlr*<sup>-/-</sup> chimeric mice transplanted with WT control or B<sup>tg</sup> bone marrow after 6 weeks western diet. **A.** Proportion of B cells expressing high levels of Fas (CD95<sup>hi</sup> GL7<sup>-</sup>). **B.** Serum total cholesterol. **C.** Body weight. **D.** Blood monocyte subsets (CD11b<sup>+</sup> Ly6G<sup>-</sup> CD115<sup>+</sup> and Ly6C lo, int or hi) and neutrophils (CD11b<sup>+</sup> Ly6G<sup>+</sup>). **E-H.** Analysis of *Ldlr*<sup>-/-</sup> chimeric mice transplanted with WT control or FcγRIIb-macrophage transgenic (M<sup>tg</sup>) bone marrow after 6 weeks western diet. **E.** Mean fluorescent intensity for FcγRIIb on B cells and CD11b<sup>+</sup> cells. **F.** Atherosclerotic plaque area. **G.** Macrophage (MOMA2)-positive area of plaque. **H.** Serum total cholesterol.

# Supplemental Figure III

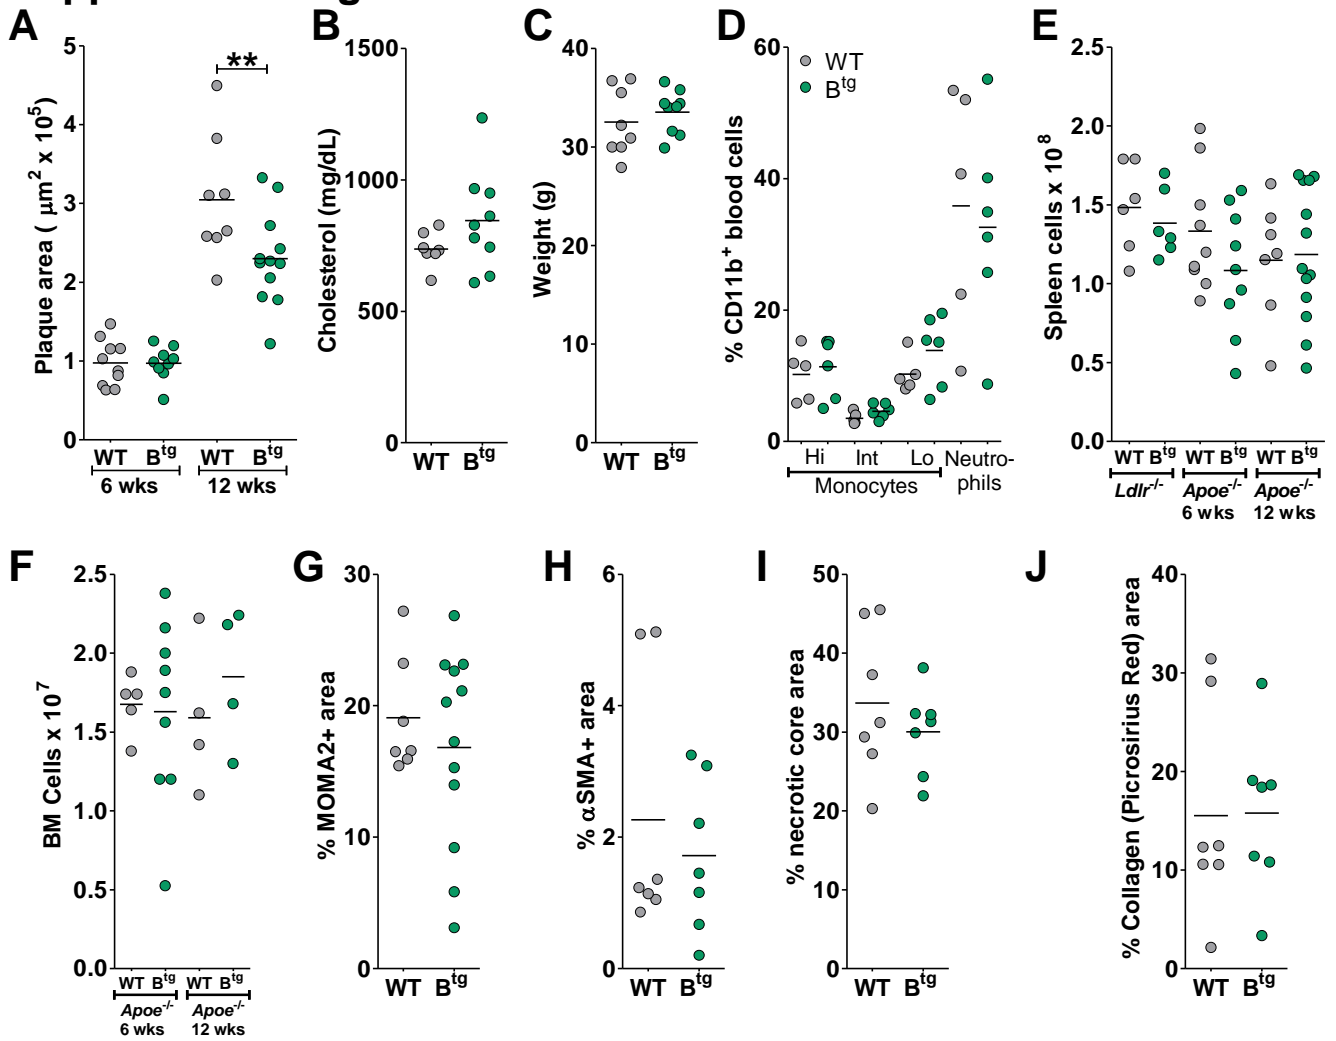

**Supplemental Figure III. A-D.** Analysis of  $Apoe^{-/-}$  or  $B^{tg}$   $Apoe^{-/-}$  mice after 6 or 12 weeks western diet. **A.** Atherosclerosis quantified using Oil Red O-stained aortic root cryosections. **B.** Serum total cholesterol. **C.** Body weight. **D.** Blood monocyte subsets (CD11b<sup>+</sup> Ly6G<sup>-</sup> CD115<sup>+</sup> and Ly6C<sup>lo</sup>, int or hi) and neutrophils (CD11b<sup>+</sup> Ly6G<sup>+</sup>). **E.** Total cell numbers in spleens from each  $B^{tg}$  cohort. **F.** Bone marrow cell numbers in  $Apoe^{-/-}$  or  $B^{tg}$   $Apoe^{-/-}$  mice after 6 or 12 weeks western diet. **G-J.** Analysis of atherosclerotic plaques for proportions of positive staining for MOMA2 (G),  $\alpha$ -SMA (H), necrotic core (I) or collagen (J) in aortic roots from  $Apoe^{-/-}$  or  $B^{tg}$   $Apoe^{-/-}$  mice after 12 weeks western diet.

## Supplemental Figure IV

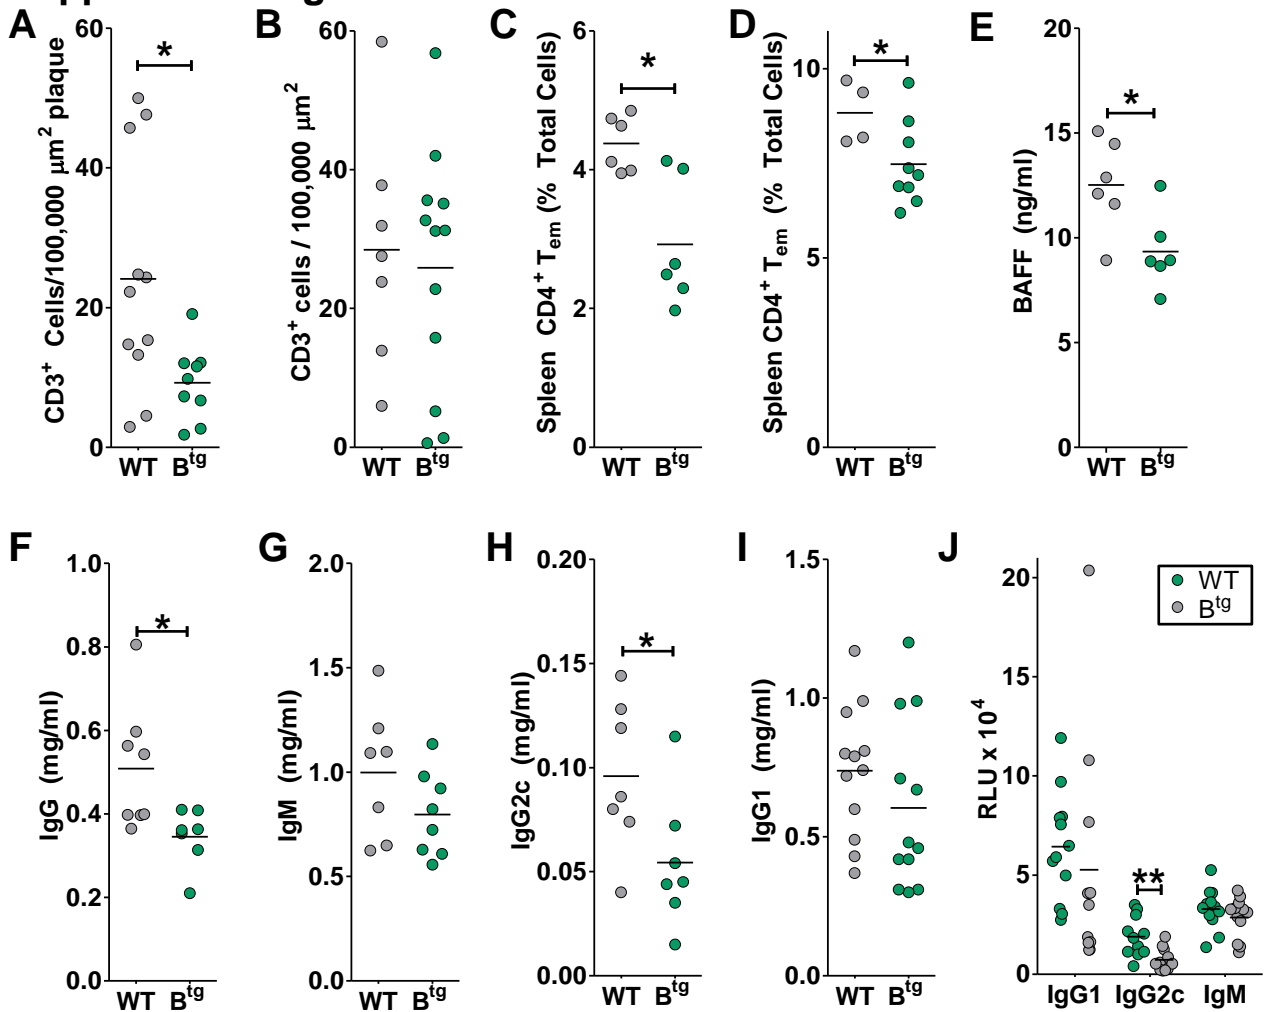

**Supplemental Figure IV. A+B.** Levels of plaque CD3<sup>+</sup> T cells in aortic roots from *Ldlr*<sup>-/-</sup> chimeric mice transplanted with WT control or B<sup>tg</sup> bone marrow after 6 weeks western diet (A) or *Apoe*<sup>-/-</sup> or B<sup>tg</sup> *Apoe*<sup>-/-</sup> mice after 12 weeks western diet (B). **C-D.** Proportion of spleen effector memory CD4<sup>+</sup> T cells (CD3<sup>+</sup> CD4<sup>+</sup> CD62L<sup>-</sup> CD44<sup>hi</sup>) in *Ldlr*<sup>-/-</sup> chimeric mice transplanted with WT control or B<sup>tg</sup> bone marrow after 6 weeks western diet (C) or *Apoe*<sup>-/-</sup> or B<sup>tg</sup> *Apoe*<sup>-/-</sup> mice after 12 weeks western diet (D). **E.** Serum BAFF levels in *Ldlr*<sup>-/-</sup> chimeric mice transplanted with WT control or B<sup>tg</sup> bone marrow after 6 weeks western diet. **F-J.** Serum antibody titres in *Ldlr*<sup>-/-</sup> chimeric mice transplanted with WT control or B<sup>tg</sup> bone marrow after 6 weeks western diet.

# Supplemental Figure V

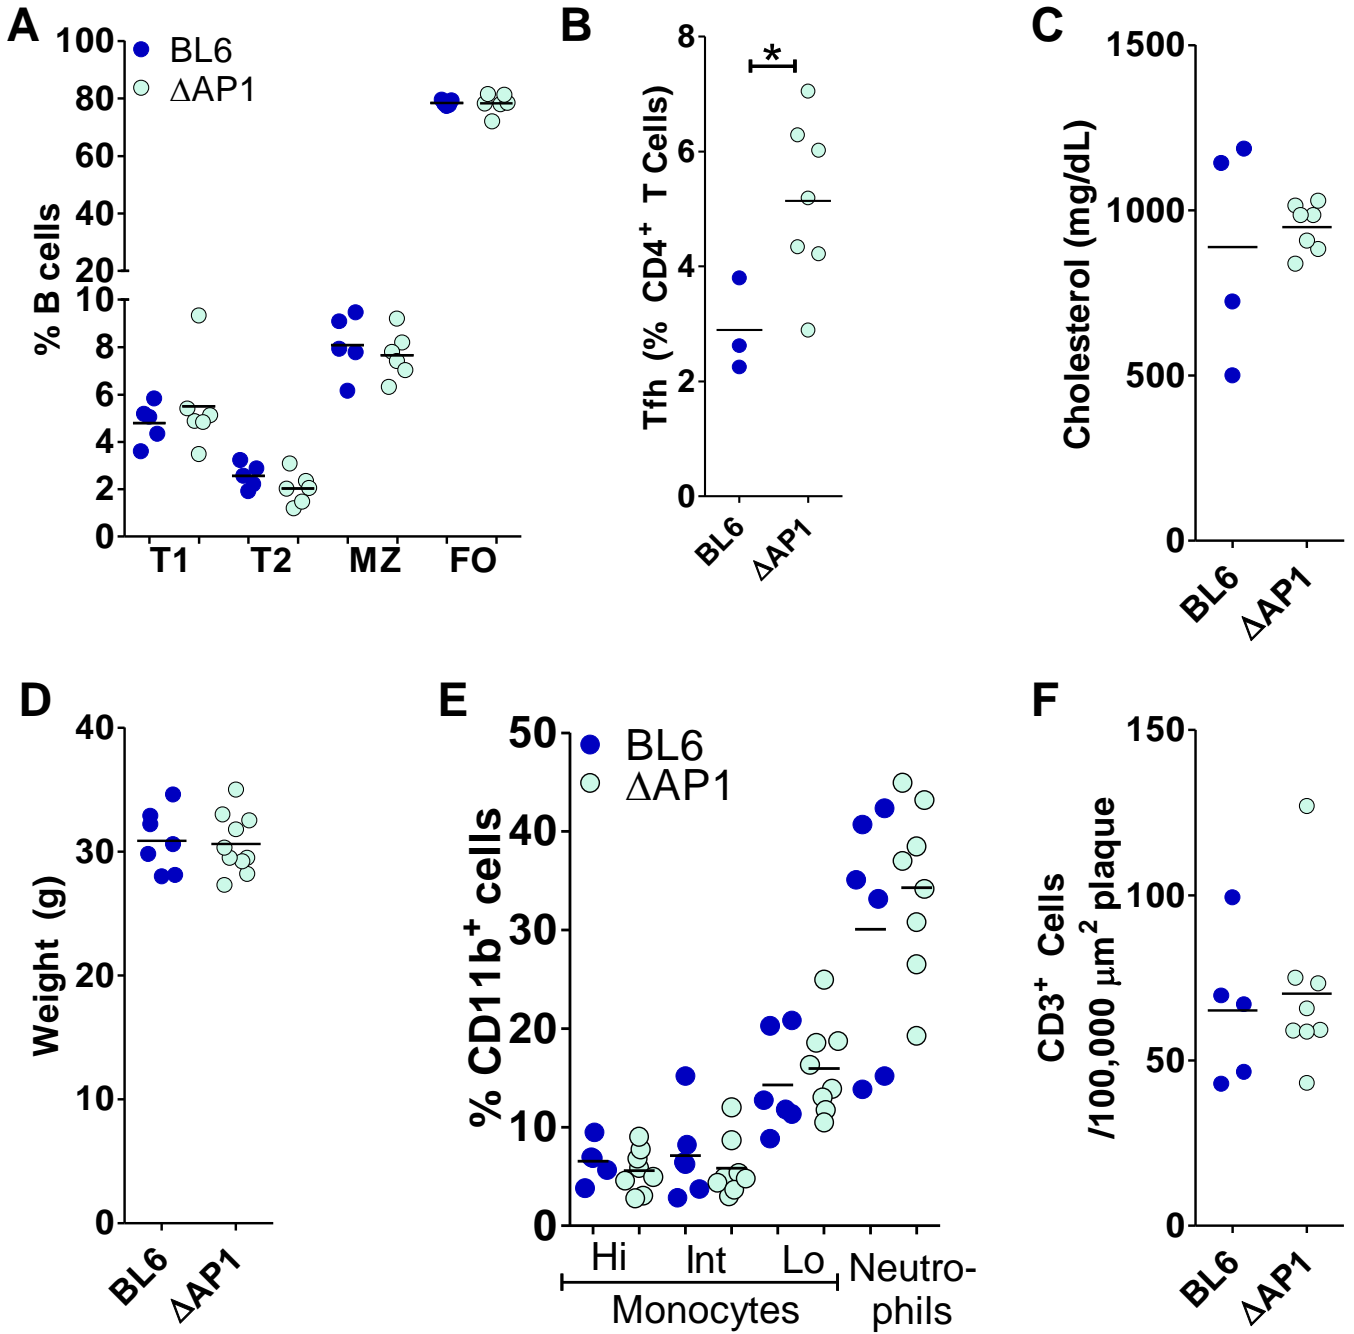

**Supplemental Figure V. A-F.** Analysis of male *FcγRIIb*<sup>BL6</sup> *Apoe*<sup>-/-</sup> (BL6) or *FcγRIIb* <sup>$\Delta$ AP-1</sup> *Apoe*<sup>-/-</sup> ( $\Delta$ AP-1) mice after 6 weeks western diet. Proportions of spleen B cell subsets (see figure S1). **B.** Follicular helper T cells (CD3<sup>+</sup> CD4<sup>+</sup> PD-1<sup>hi</sup> CXCR5<sup>hi</sup>). **C.** Body weights. **D.** Serum total cholesterol. **E.** Blood monocytes subsets (CD11b<sup>+</sup> Ly6G<sup>-</sup> CD115<sup>+</sup> and Ly6C lo, int or hi) and neutrophils (CD11b<sup>+</sup> Ly6G<sup>+</sup>). **F.** Plaque CD3<sup>+</sup> Cells. \*p<0.05.

# Supplemental Figure VI

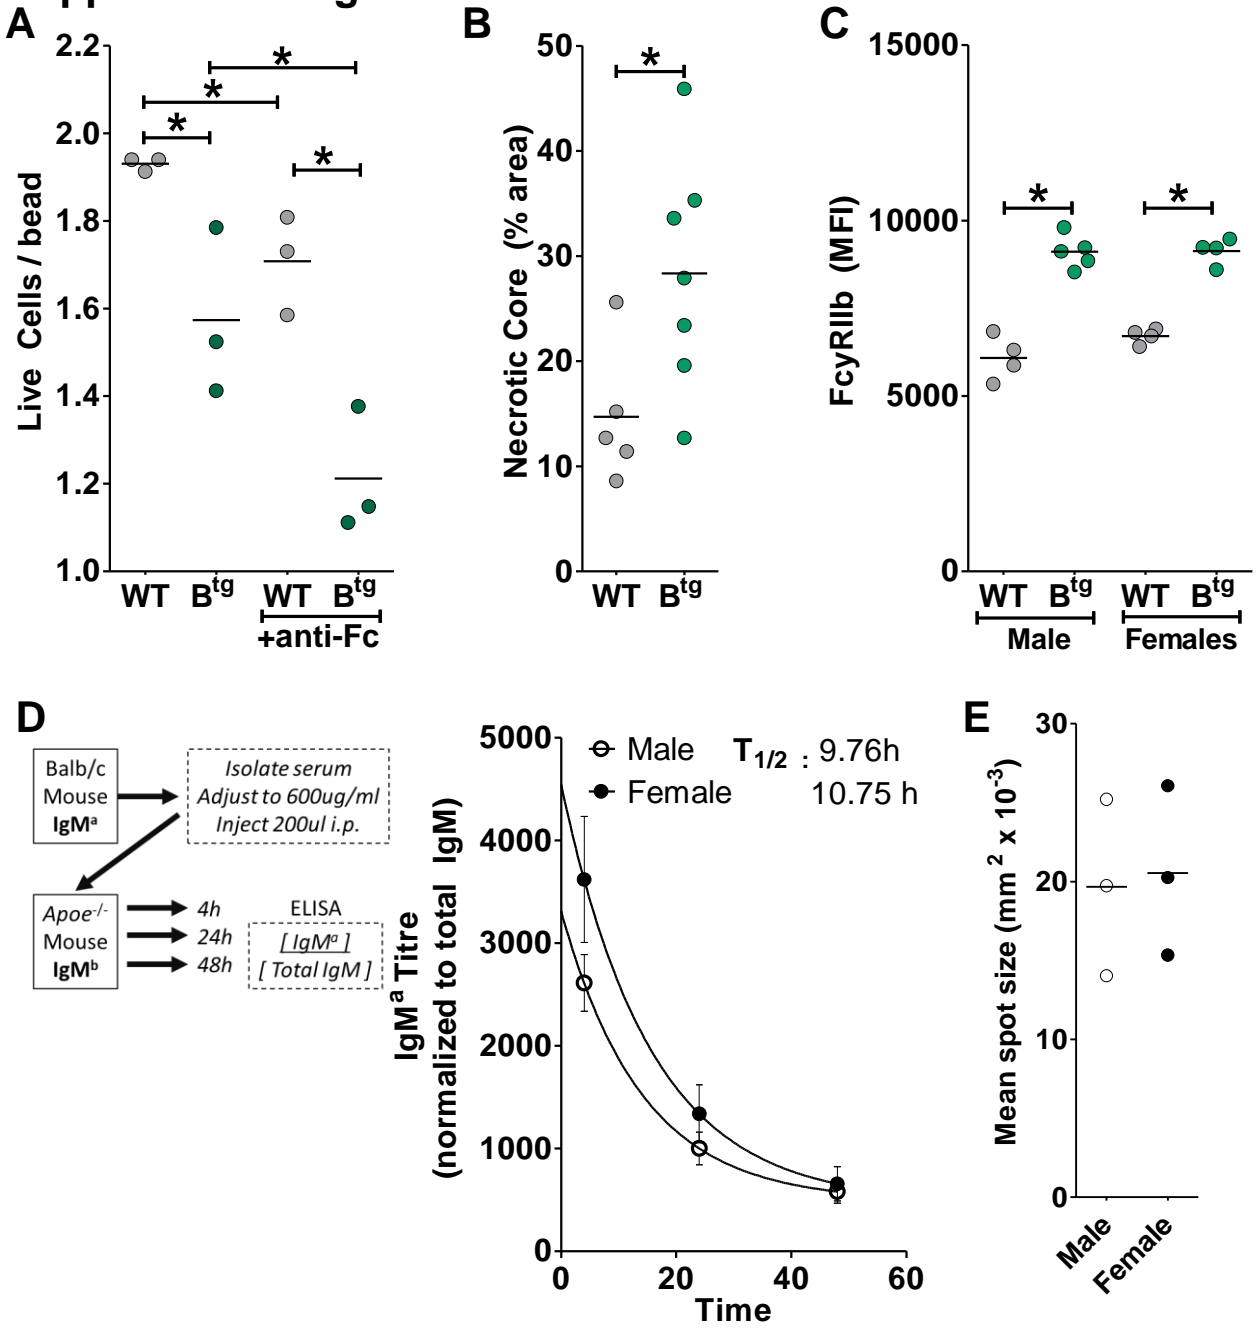

**Supplemental Figure VI. A.** B1 cells purified from peritoneum of *Apoe*<sup>-/-</sup> or B<sup>tg</sup> *Apoe*<sup>-/-</sup> mice were cultured for 16h with or without anti-FcγRIIB (2.4G2 antibody) then stained with annexin V and propidium iodide. Absolute numbers of remaining live cells (AnnV<sup>-</sup> PI<sup>+</sup>) was quantified by flow cytometry using beads for normalization. **B.** Necrotic core area in aortic root plaques from female *Apoe*<sup>-/-</sup> or B<sup>tg</sup> *Apoe*<sup>-/-</sup> mice after 6 weeks western diet. **C.** FcγRIIb levels on Spleen B1 cells in male and female *Apoe*<sup>-/-</sup> or B<sup>tg</sup> *Apoe*<sup>-/-</sup> mice. **D.** IgM clearance rates determined after transfer of IgM<sup>a</sup> serum (from Balb/c mice) into male or female *Apoe*<sup>-/-</sup> mice (each gender received gender matched serum). **E.** Mean spot size of IgM-secreting spleen cells from male and female *Apoe*<sup>-/-</sup> mice analysed by Elispot. Representative experiment of more than 5.

# Supplemental Figure VII

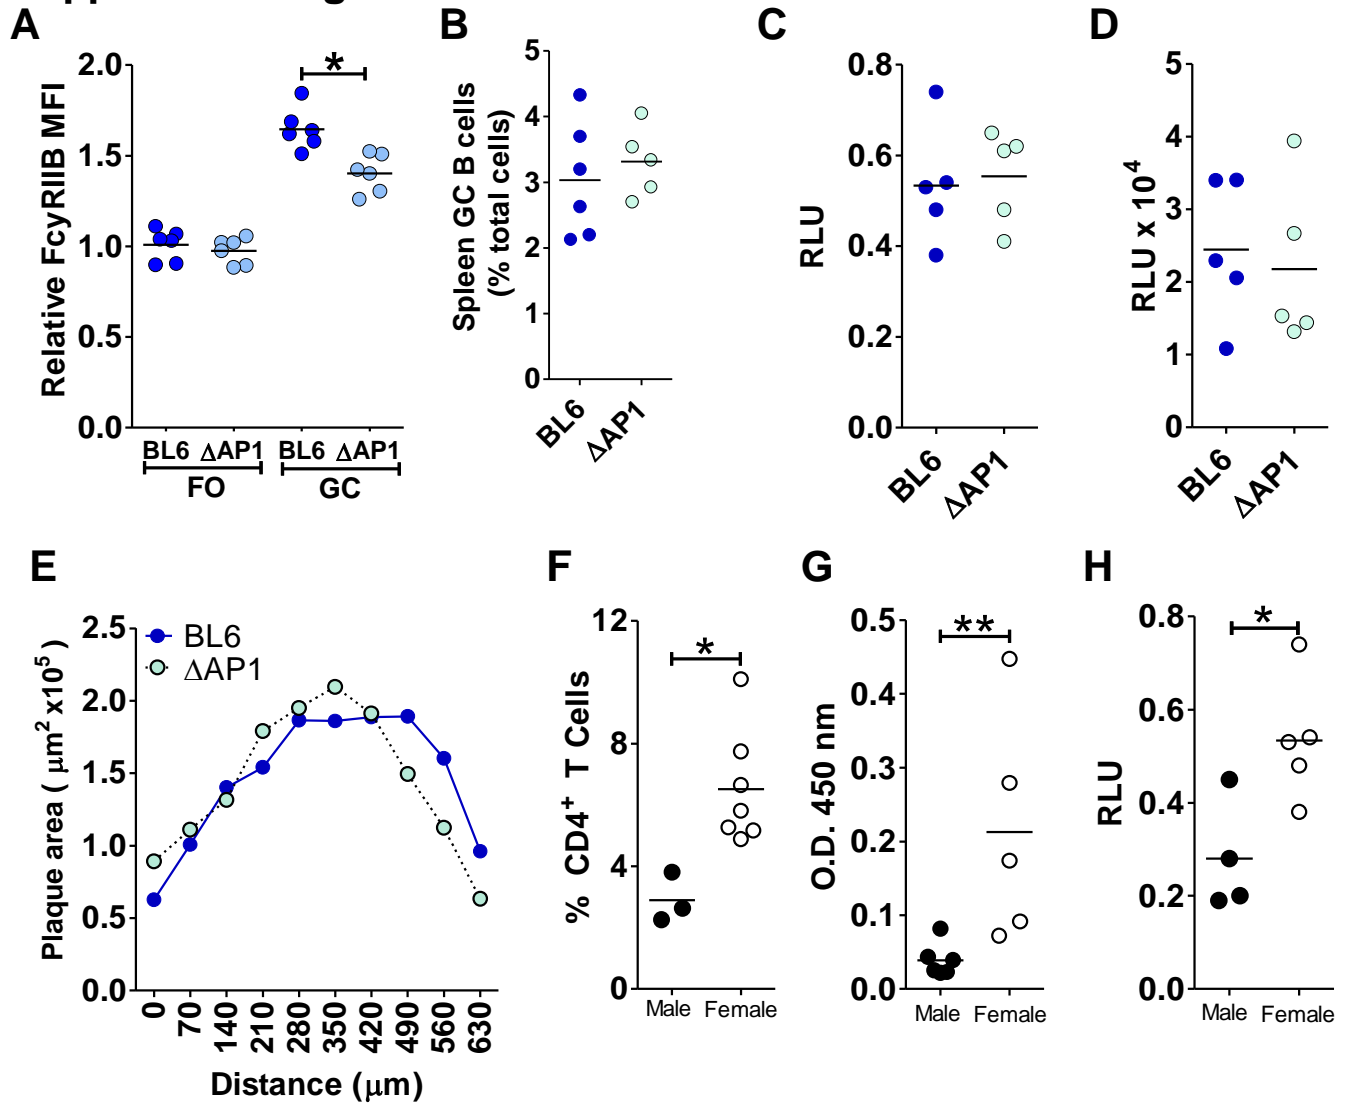

**Supplemental Figure VII. A-E.** Analysis of *Apoe*<sup>-/-</sup> or *FcγRIIb*<sup>ΔAP-1</sup> *Apoe*<sup>-/-</sup> female mice after 6 weeks western diet. **A.** Mean fluorescence intensity (MFI) of anti-FcγRIIb staining on follicular (FO) or germinal center (GC) B cells from *Apoe*<sup>-/-</sup> or *FcγRIIb*<sup>ΔAP-1</sup> *Apoe*<sup>-/-</sup> female mice. **B.** Spleen GC B cell levels. **C.** Total serum IgG2c. **D.** Total IgM levels. **E.** Atherosclerotic plaque area. N=6/group. \*p<0.05. **F-H.** Comparison of male and female *Apoe*<sup>-/-</sup> mice. **F.** Follicular helper T cells. **G.** Anti-dsDNA IgG antibodies. **H.** Total IgG2c.



## Supplemental Table I

| <b>Target</b> | <b>Clone</b> | <b>Company</b> |
|---------------|--------------|----------------|
| Ly6C          | 7/4          | AbD Serotec    |
| Ly-6G         | 1A8          | BD             |
| CD95 (Fas)    | Jo2          | BD             |
| CD11b         | M1/70        | Biolegend      |
| CD11c         | N418         | Biolegend      |
| CD16.2        | 9E9          | Biolegend      |
| CD43          | Ly48 gp115   | Biolegend      |
| CD44          | 1M7          | Biolegend      |
| CD62L         | MEL-14       | Biolegend      |
| CD138         | 281-2        | Biolegend      |
| CD3           | 145-2C11     | Biolegend      |
| CD19          | 6D5          | Biolegend      |
| CXCR5         | L138D7       | Biolegend      |
| PD-1          | 4B12         | Biolegend      |
| CD23          | B3B4         | Biolegend      |
| CD16/32       | 93           | Biolegend      |
| MHCII         | M5/114.15.2  | Biolegend      |
| B220          | RA3-6B2      | Life Tech.     |
| CD4           | RM4-5        | Life Tech.     |
| IgM           | II/41        | Life Tech.     |
| GL7           | GL7          | Life Tech.     |
| CD21          | 4E3          | Life Tech.     |
| CD115         | AFS98        | Life Tech.     |
| Ki67          | SolA15       | Life Tech.     |
| CD64          | REA286       | Miltenyi       |

**Supplemental Table II** - Summary of effects of B cell FcγRIIB models on major parameters

| <b><i>FcγRIIb</i></b><br><b><i>mutation</i></b> | <b>FcγRIIB<sup>Btg</sup></b><br><i>(increased FcγRIIB on B cells)</i> |                                  |                      | <b>FcγRIIB<sup>ΔAP-1</sup></b><br><i>(decreased FcγRIIb on GC B Cells)</i> |                      |
|-------------------------------------------------|-----------------------------------------------------------------------|----------------------------------|----------------------|----------------------------------------------------------------------------|----------------------|
| <b><i>Model</i></b>                             | <b><i>Ldlr<sup>-/-</sup></i></b>                                      | <b><i>ApoE<sup>-/-</sup></i></b> |                      | <b><i>ApoE<sup>-/-</sup></i></b>                                           |                      |
| <b><i>Gender</i></b>                            | <b><i>Male</i></b>                                                    | <b><i>Male</i></b>               | <b><i>Female</i></b> | <b><i>Male</i></b>                                                         | <b><i>Female</i></b> |
| <b>Parameter:</b>                               |                                                                       |                                  |                      |                                                                            |                      |
| Plasma Cells                                    | n.d.                                                                  | ↓                                | ↓*                   | ↔                                                                          | ↔*                   |
| GC B Cells                                      | n.d.                                                                  | ↓                                | ↓*                   | ↑                                                                          | ↔                    |
| B1 Cells                                        | ↔*                                                                    | ↔                                | ↓                    | ↔                                                                          | ↔*                   |
| IgG2c                                           | ↓                                                                     | ↓                                | ↓*                   | ↑                                                                          | ↔                    |
| IgG1                                            | ↓                                                                     | ↓                                | ↓*                   | ↔                                                                          | ↔*                   |
| IgM                                             | ↔                                                                     | ↔                                | ↓                    | ↑                                                                          | ↔*                   |
| Teff                                            | ↓                                                                     | ↓                                | ↓*                   | ↔                                                                          | ↔*                   |
| Atherosclerosis                                 | ↓                                                                     | ↓                                | ↑                    | ↑                                                                          | ↔                    |

\*Data not shown.
